# Supplementary material for: Mechanisms of reactions conducted on α-amido-α-aminonitrones, determined based on the structures of their crystalline products and DFT calculations
Source: Royal Society of Chemistry journal article supplement (doi:10.1039/c0nj00193g), 2010-01-01
Supplement: c0nj00193g.pdf [file c0nj00193g.pdf]

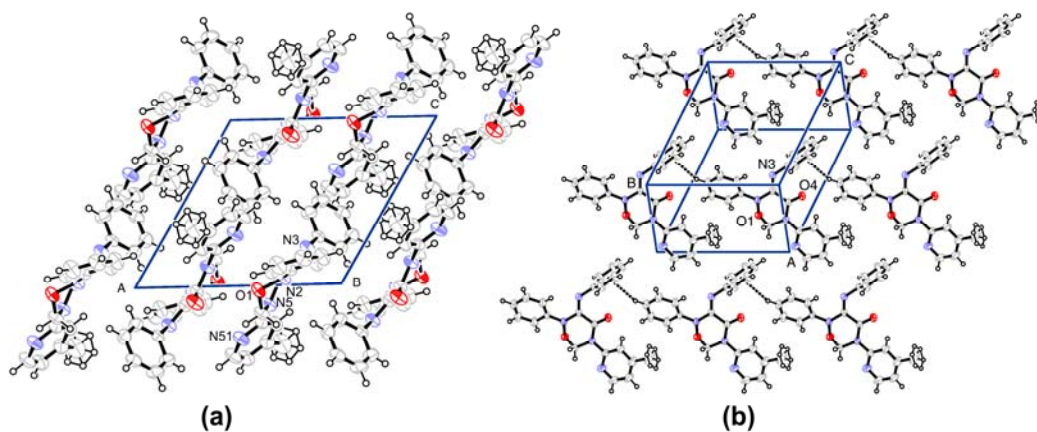

Fig. S1: (a) Packing of the molecules of **6b** in a projection along [010]; (b) arrangement of the molecules in the layer, parallel to (100) at  $x = 0.250$ , formed due to weak intermolecular interactions: C24-H24...Cg2 ( $x, y+1, z$ ), marked by dashed lines, with the geometrical parameters: H...A  $y+ = 2.92\text{Å}$ , D...A =  $3.797\text{Å}$ , and  $\angle\text{DHA} = 157^\circ$ .

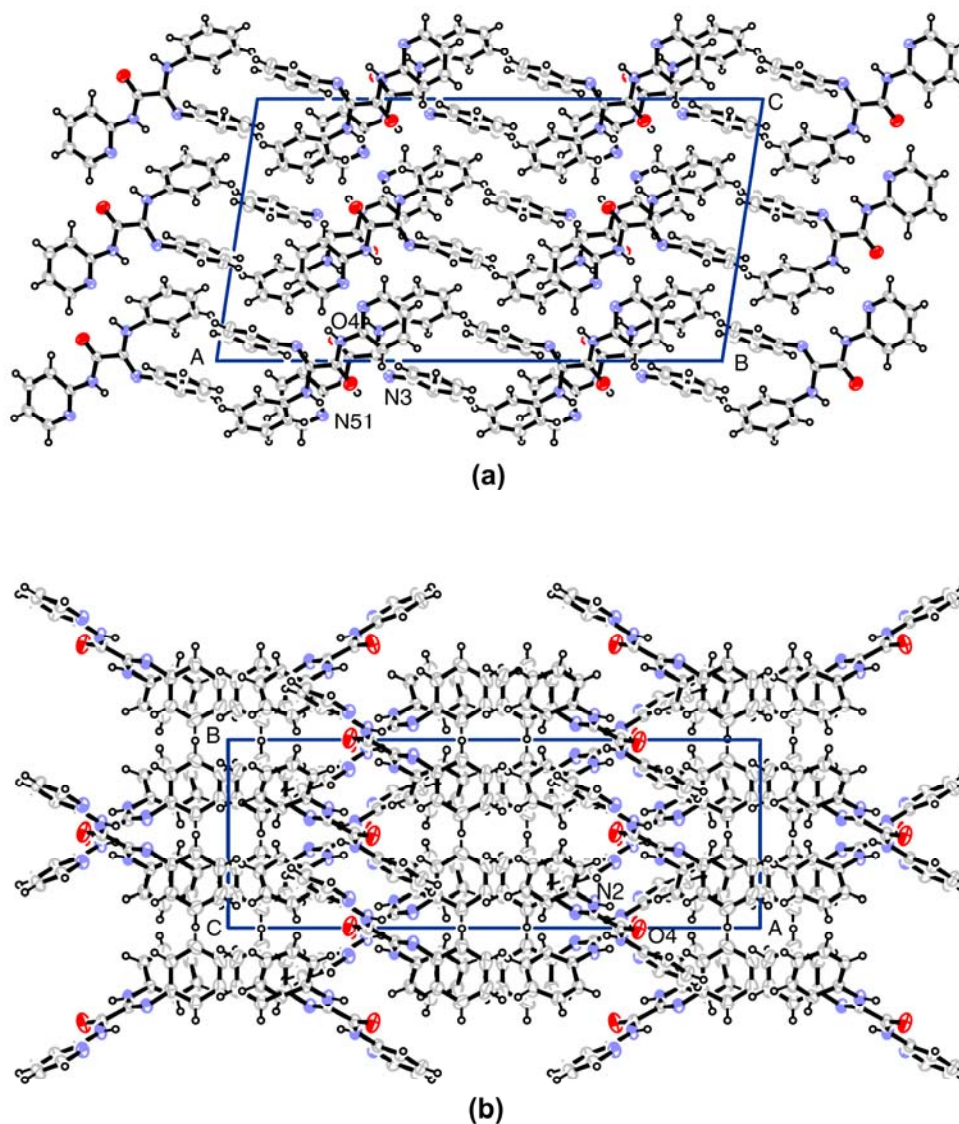

Fig. S2: The packing of the molecules **7a**: (a) in a projection along [010]; (b) in a projection along [001].

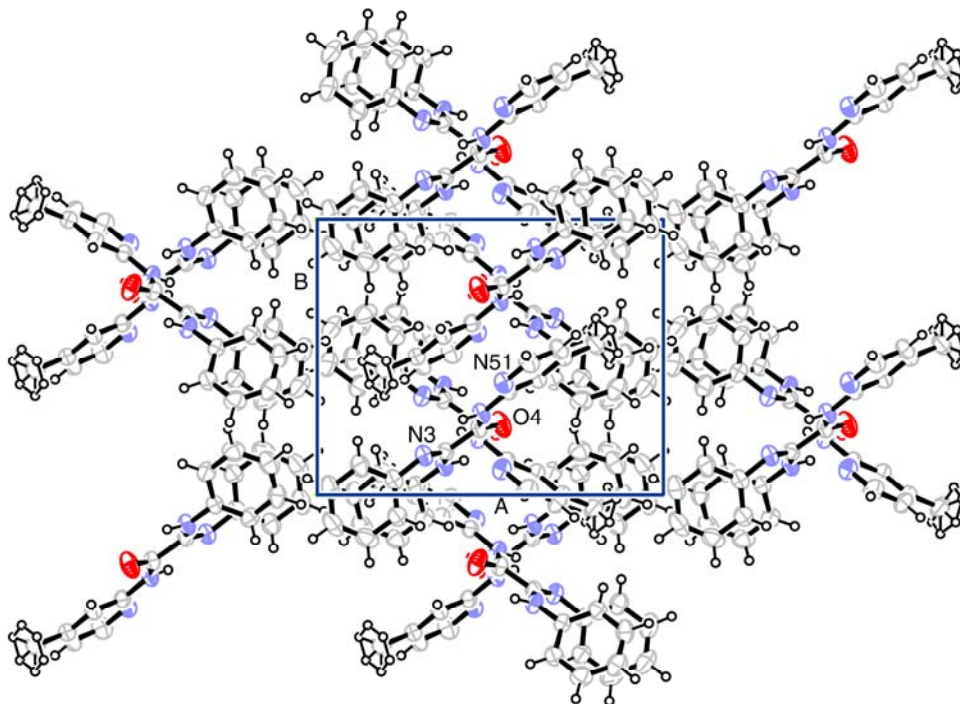

Fig. S3: The packing of the molecules of **7b** in a projection along [001].

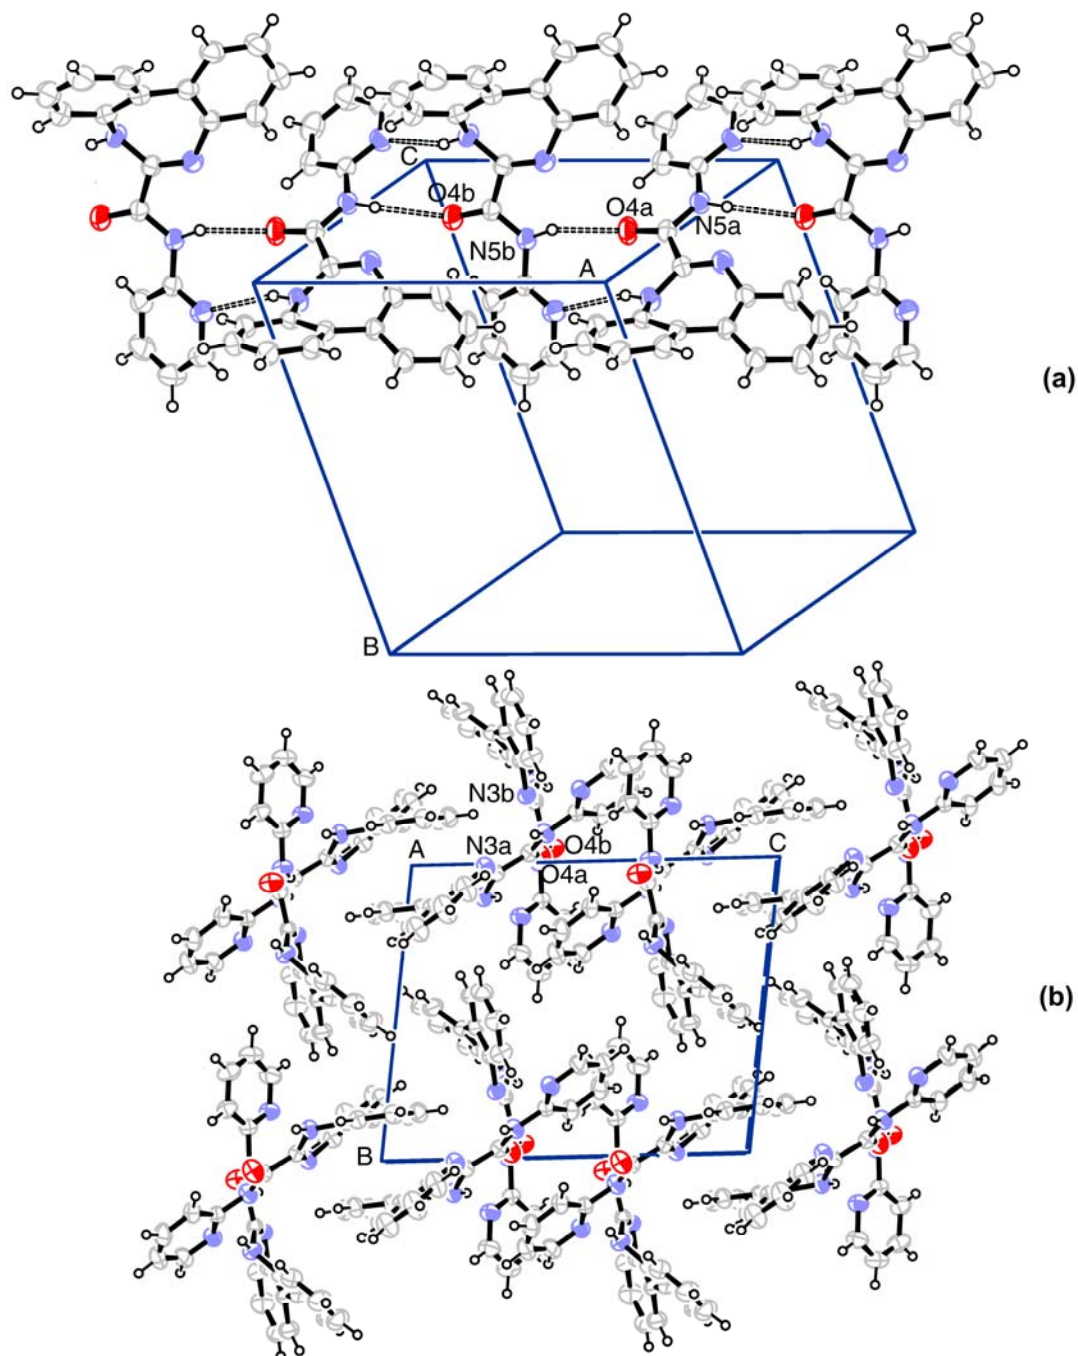

Fig. S4: The packing of the molecules of **11a**: (a) the view of a tape (consisting of atoms at  $x, y-1, z$ ) running along [100] and built of the alternate diastereomeric molecules of **11a\_a** and **11a\_b**, joined by the H-bonds of N-H...O and N-H...N types, defined in Table 3; (b) in a projection along [100] i.e. along the axis of the tape.

Supplementary Material (ESI) for New Journal of Chemistry  
 This journal is © The Royal Society of Chemistry and  
 The Centre National de la Recherche Scientifique, 2010

**Table S1** Geometric parameters of weak interactions. Cg1 and Cg2 denote the gravity centres of the C21^C26 and C31^C36 rings, respectively

| D-H...A                         | D-H/Å                  | H...A/Å | D...A/Å | ∠DHA/° |
|---------------------------------|------------------------|---------|---------|--------|
| <b>6a</b>                       |                        |         |         |        |
| C54-H54...O4 <sup>ii</sup>      | 0.93                   | 2.58    | 3.420   | 151    |
| O4...N5 <sup>i</sup>            |                        |         | 3.261   |        |
| O4...Cg2                        |                        |         | 3.360   |        |
| <b>6b</b>                       |                        |         |         |        |
| C24-H24...O4 <sup>i</sup>       | 0.93                   | 2.61    | 3.261   | 127    |
|                                 | 0.93                   | 2.92    | 3.797   | 157    |
|                                 |                        |         | 3.238   |        |
| <b>7a</b>                       |                        |         |         |        |
| O4...N5 <sup>i</sup>            | C24-                   |         | 3.233   |        |
|                                 | H24...Cg2 <sup>i</sup> |         |         |        |
| Cg1...Cg2                       | C3...N5 <sup>ii</sup>  |         | 3.955   |        |
| <b>7b</b>                       |                        |         |         |        |
| O4...N5 <sup>i</sup>            |                        |         | 3.193   |        |
| Cg1...Cg2                       |                        |         | 3.658   |        |
| <b>11a</b>                      |                        |         |         |        |
| C34b-H34b...Cg2a <sup>ii</sup>  | 0.93                   | 2.77    | 3.589   | 148    |
| C55a-H55a...Cg2b <sup>iii</sup> | 0.93                   | 3.07    | 3.913   | 152    |
| C56b-H56b...Cg1b <sup>iv</sup>  | 0.93                   | 3.08    | 3.858   | 143    |
| O4a...N51b                      |                        |         | 3.221   |        |
| O4b...N51a <sup>i</sup>         |                        |         | 3.155   |        |

Symmetry codes: **6a**: (i) -x+3, -y, -z+1; (ii) -x+1, -y+1, -z+1; **6b**: (i) x, y+1, z; **(ii)** -x, -y-1, -z-1; **7a**: (i) x, -y, z+1/2; **7b**: (i) x, -y+1/2, z-1/2; **11a**: (i) x-1, y, z; (ii) x, y-1, z; (iii) -x+2, -y+1, -z+1; (iv) x, y+1, z.
